# Supplementary material
Source: publisher figshare collection journal article supplement (https://gsapubs.figshare.com/ndownloader/files/22757450)
Supplement: Supplementary file 1 [file 22757450]

# Ultra fast oceanic spreading of the Marsili basin, southern Tyrrhenian Sea: Evidence from magnetic anomaly analysis

*Nicolosi, I., Speranza, F., Chiappini, M.*

## Supporting online material (Figures DR1-DR6)

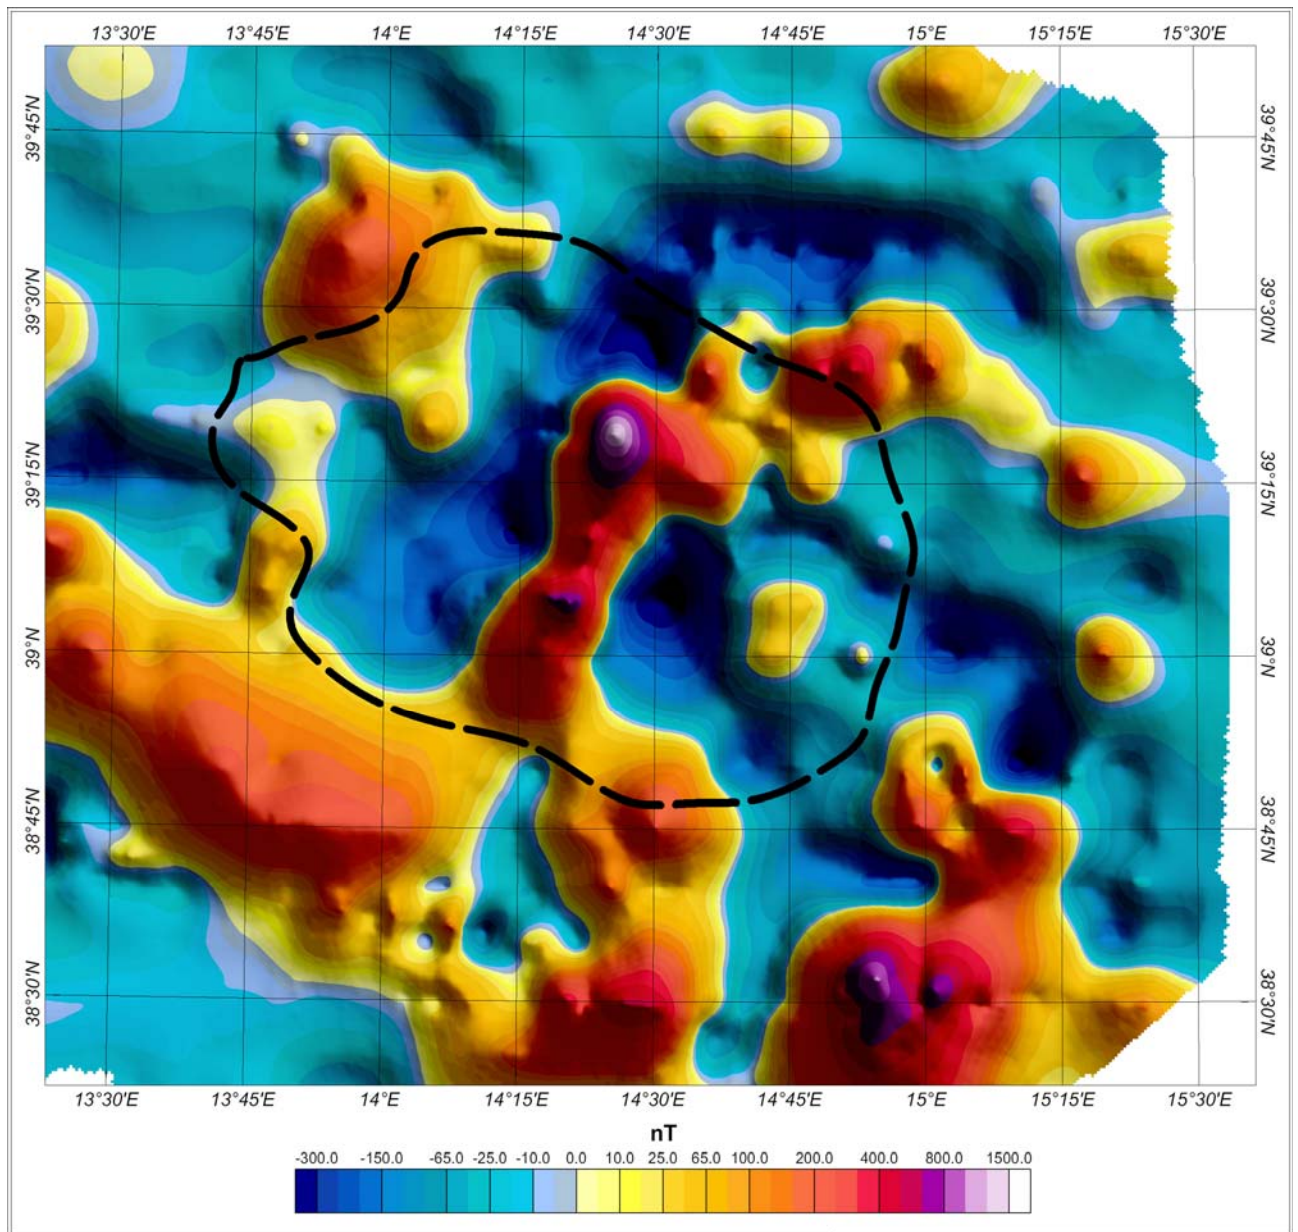

Figure DR1: Magnetic Anomaly Map of the Marsili basin and surrounding areas acquired at sea level (Chiappini et al., 2000). The black dashed line is the margin of the deep basin floor as in Figure 1.

Ultra fast oceanic spreading of the Marsili basin, southern Tyrrhenian Sea: Evidence from magnetic anomaly analysis

*Nicolosi, I., Speranza, F., Chiappini, M.*

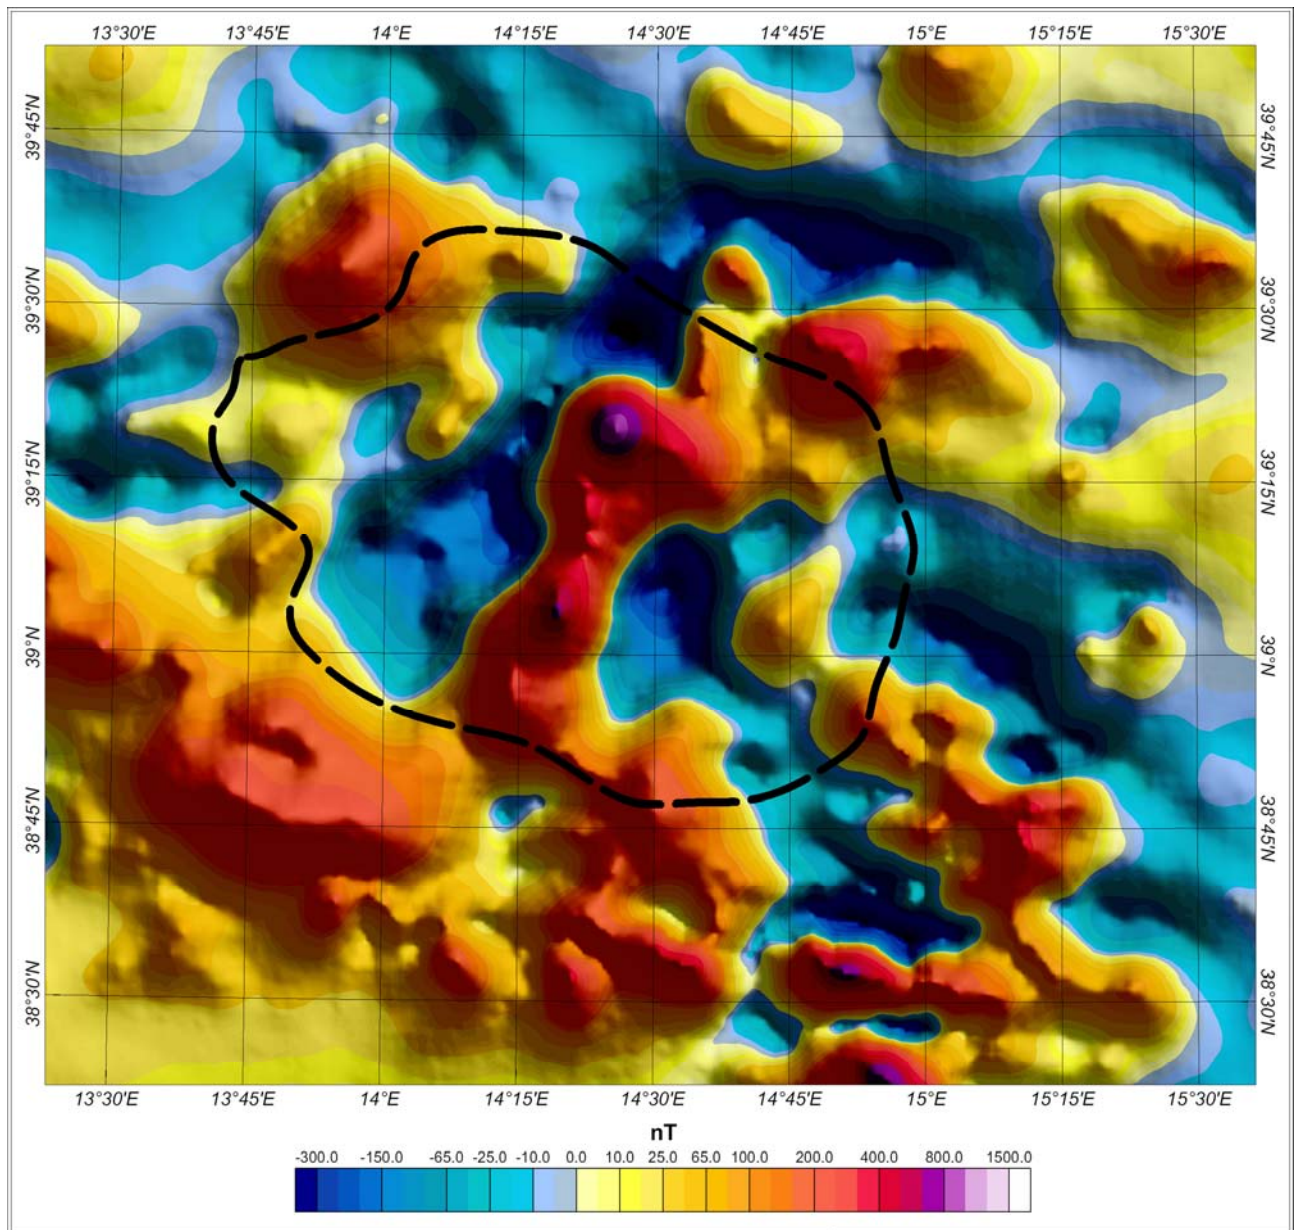

Figure DR2: Magnetic Anomaly Map of the Marsili basin and surrounding areas acquired at 4800 feet (1460 m) of altitude (AGIP, 1981). The black dashed line is the margin of the deep basin floor as in Figure 1.



Ultra fast oceanic spreading of the Marsili basin, southern Tyrrhenian Sea: Evidence from magnetic anomaly analysis

*Nicolosi, I., Speranza, F., Chiappini, M.*

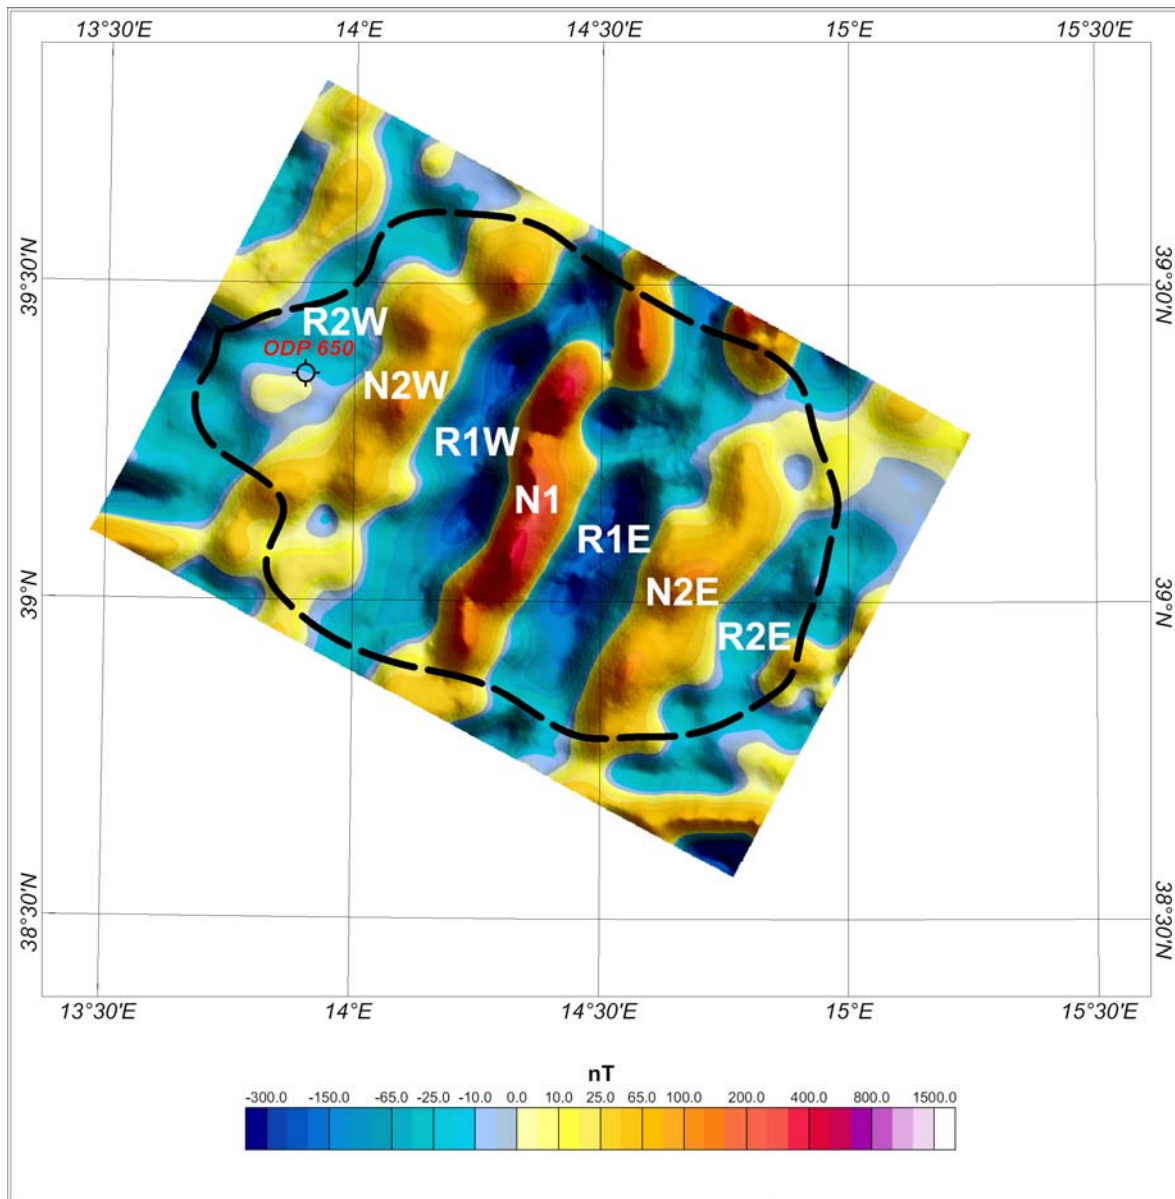

Figure DR3. 2D high-pass frequency filter applied to the airborne magnetic anomaly map of the Marsili basin (AGIP, 1981). The cutting wavelength is 40 km along the WNE-ESE direction, while no cutting was applied along the orthogonal trend (see text). The black dashed line is the margin of the deep basin floor as in Figure 1. The location of the ODP site 650 is from (Kastens et al., 1988).

Ultra fast oceanic spreading of the Marsili basin, southern Tyrrhenian Sea: Evidence from magnetic anomaly analysis

*Nicolosi, I., Speranza, F., Chiappini, M.*

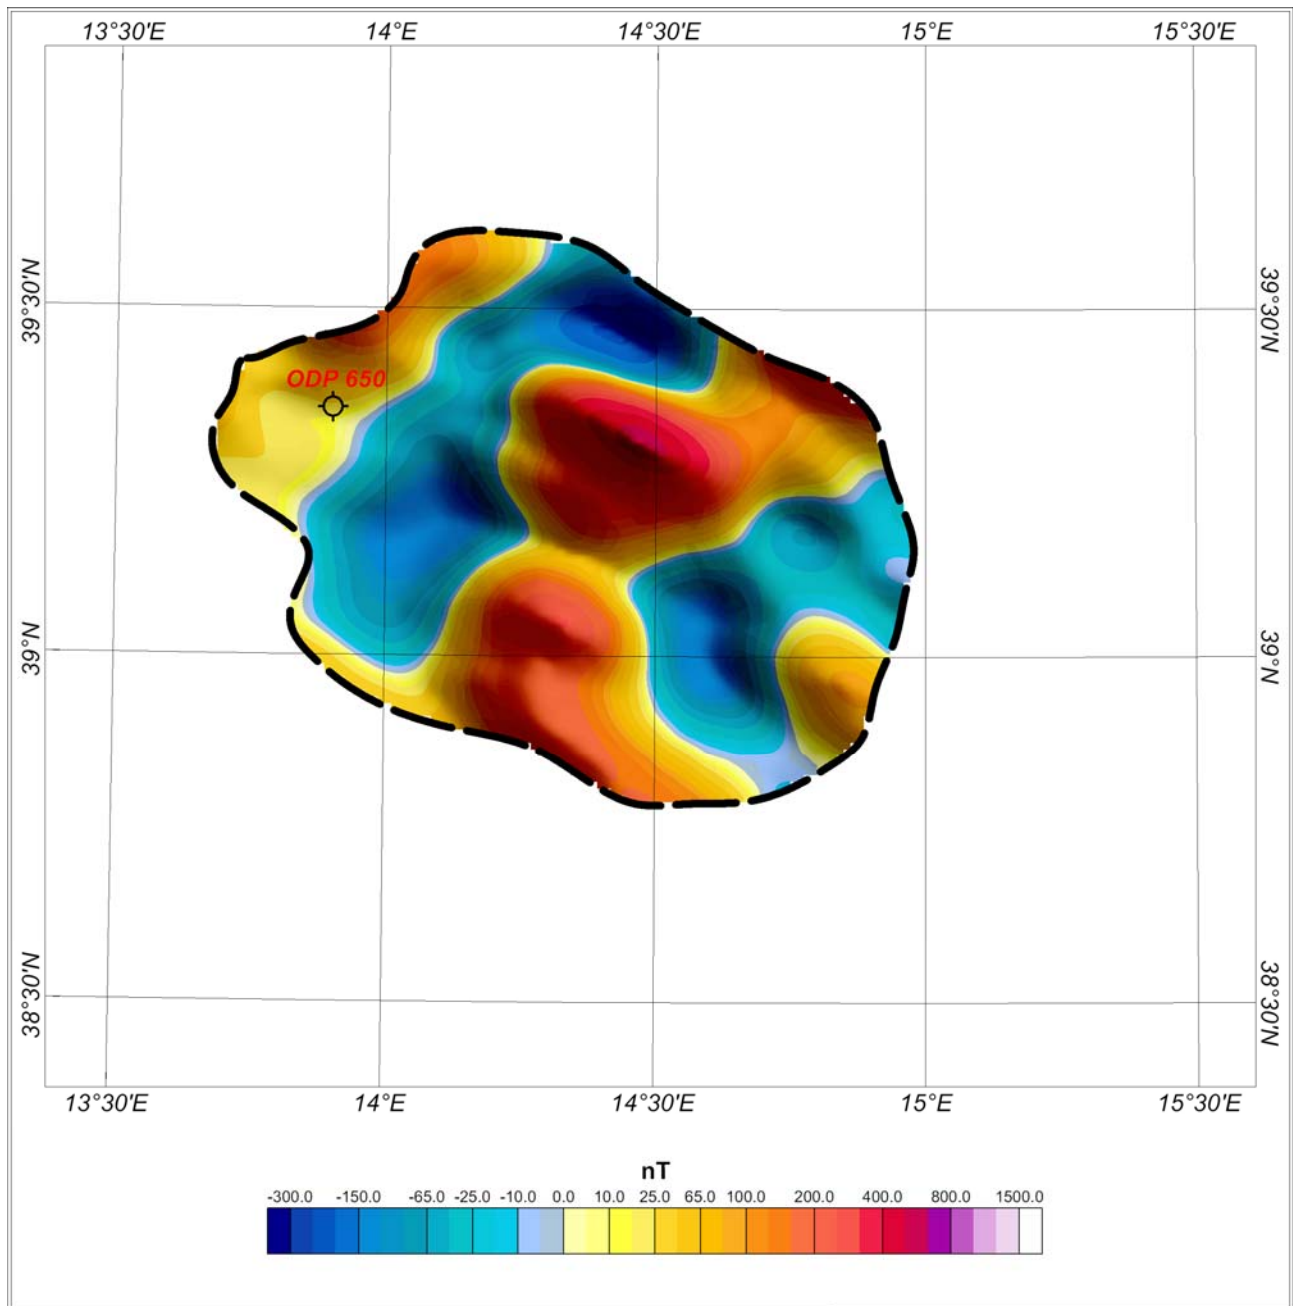

Figure DR4. 2D low-pass frequency filter applied to the shipborne magnetic anomaly map of the Marsili basin (Chiappini et al., 2000). The cutting wavelength is 40 km along the WNE-ESE direction, while no cutting was applied along the orthogonal trend (see text). The black dashed line is the margin of the deep basin floor as in Figure 1. The location of the ODP site 650 is from Kastens et al. (1988).

Ultra fast oceanic spreading of the Marsili basin, southern Tyrrhenian Sea: Evidence from magnetic anomaly analysis

*Nicolosi, I., Speranza, F., Chiappini, M.*

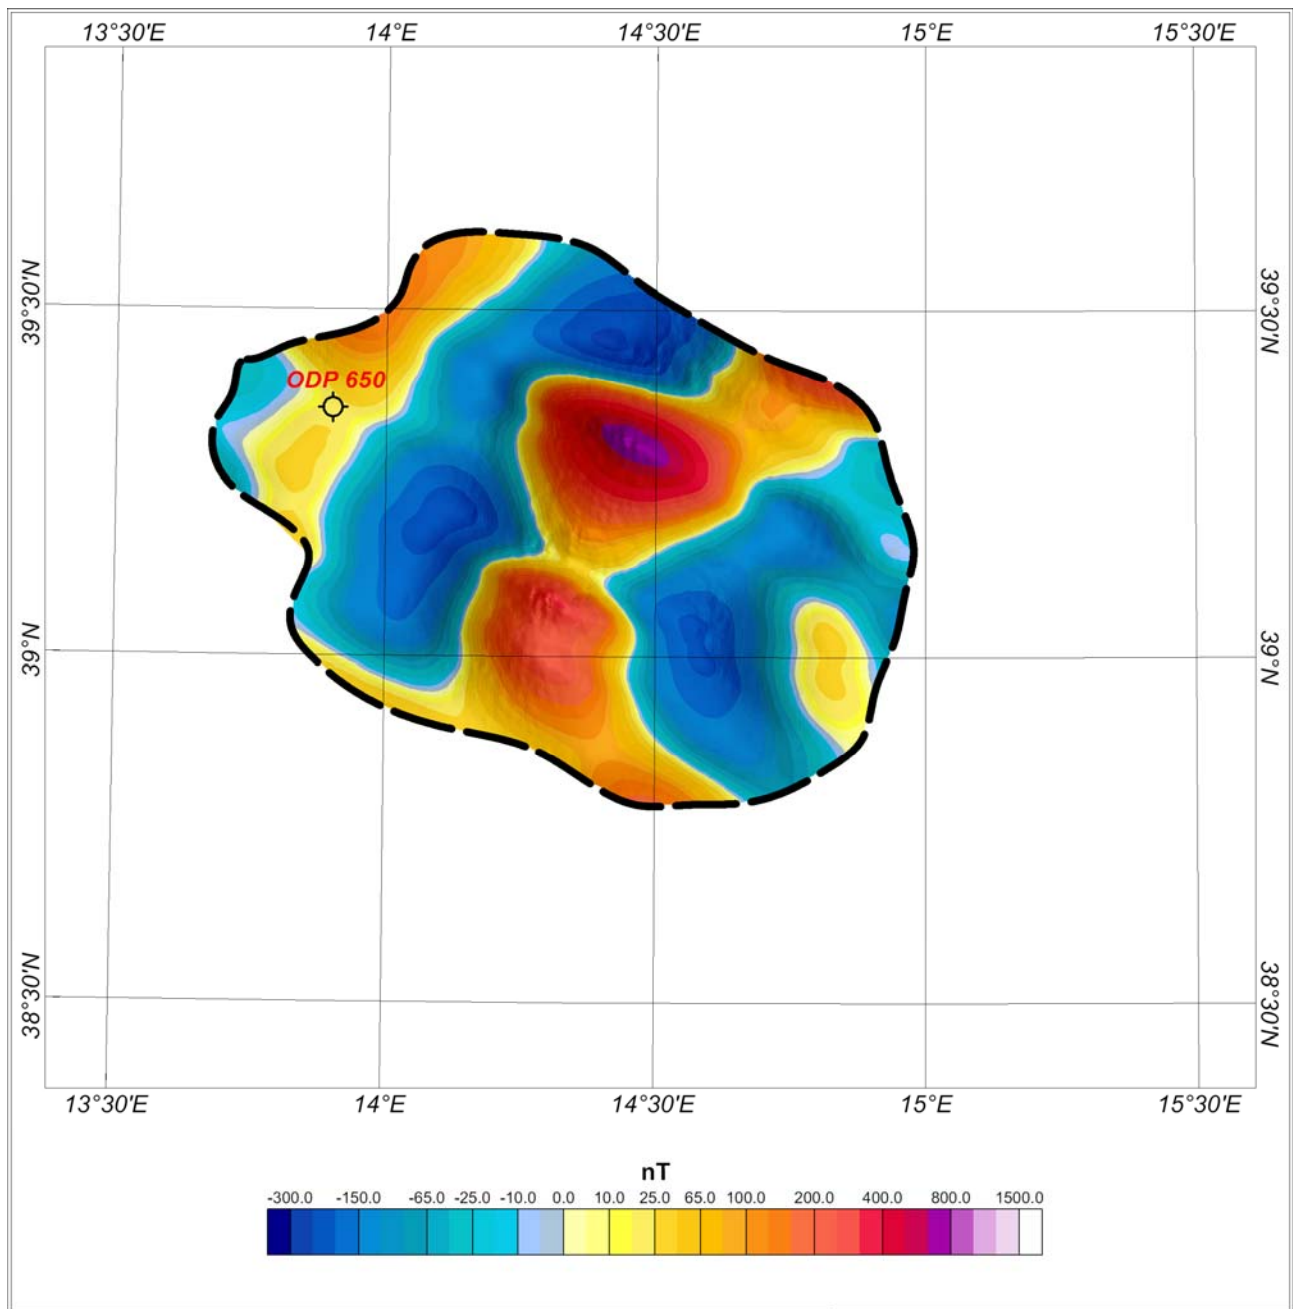

Figure DR5. 2D low-pass frequency filter applied to the airborne magnetic anomaly map of the Marsili basin (AGIP, 1981). The cutting wavelength is 40 km along the WNE-ESE direction, while no cutting was applied along the orthogonal trend (see text). The black dashed line is the margin of the deep basin floor as in Figure 1. The location of the ODP site 650 is from Kastens et al. (1988).

Ultra fast oceanic spreading of the Marsili basin, southern Tyrrhenian Sea: Evidence from magnetic anomaly analysis

*Nicolosi, I., Speranza, F., Chiappini, M.*

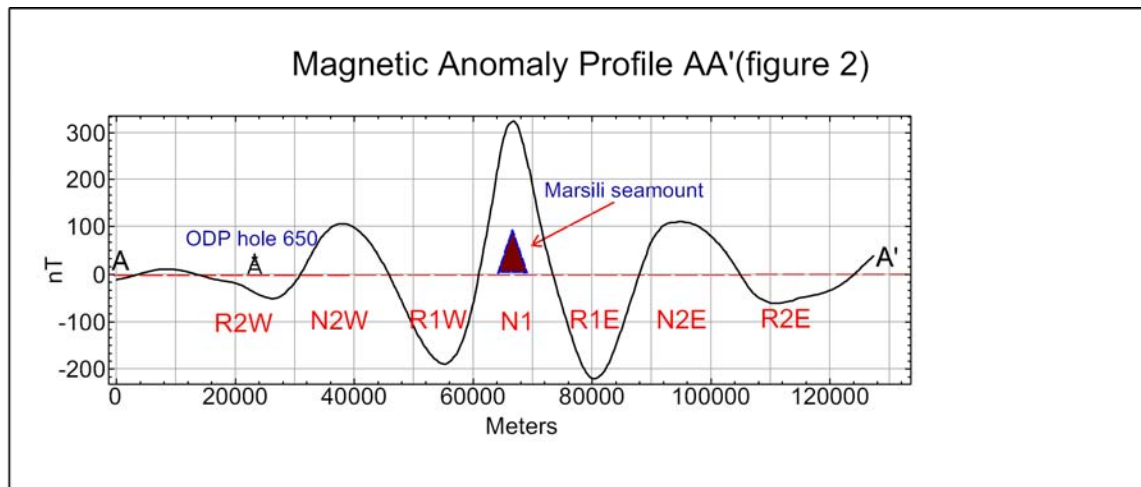

Figure DR6. Magnetic anomaly profile from the shipborne magnetic anomaly map shown in Figure 2. The locations of the Marsili seamount and ODP hole 650 are also shown. The names of the magnetic anomaly stripes are as in Figure 2.
